# Supplementary material for: Degradation of aniline with zero-valent iron as an activator of persulfate in aqueous solution
Source: Royal Society of Chemistry journal article supplement (doi:10.1039/c3ra43364a), 2013-11-15
Supplement: c3ra43364a.pdf [file c3ra43364a.pdf]

## **Degradation of aniline with zero-valent iron as an activator of persulfate in aqueous solution**

Imtyaz Hussain<sup>a</sup>, Yongqing Zhang<sup>a,b,\*</sup>, Shaobin Huang<sup>a,b,c</sup>,

*<sup>a</sup>College of Environment and Energy, South China University of Technology, Guangzhou,  
510006, PR China*

*<sup>b</sup>Guangdong Provincial Key Laboratory of Atmospheric environment and Pollution  
Control, Guangzhou, 510006, PR China*

*<sup>c</sup>State Key Laboratory of Pulp and Paper Engineering, South China University of  
Technology, Guangzhou, 510640, PR China*

\* Corresponding author: Yongqing Zhang

Tel: +86-20-39380569

Fax: +86-20-39380508

E-mail address: zhangyq@scut.edu.cn

### Supporting Information

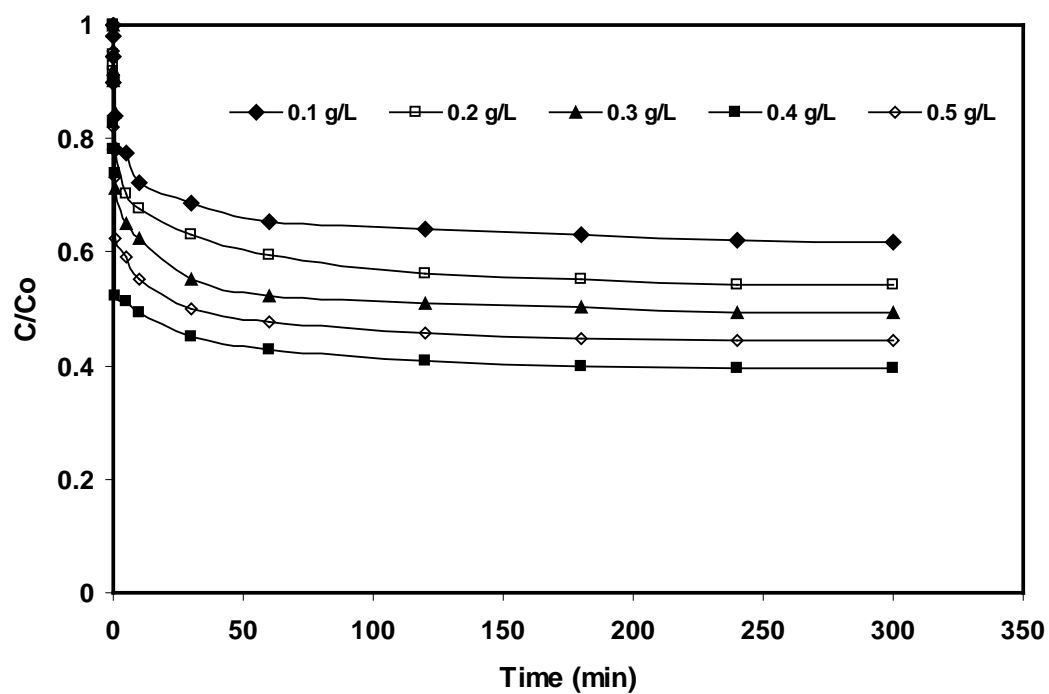

**Fig. 1.** Effect of  $Fe^{2+}$  dosages on aniline degradation in persulfate-  $Fe^{2+}$  system.  $[Aniline]_0 = 0.05$  mM; Temp. =  $25^\circ C$ ;  $[PS]_0 = 2.5$  mM; pH = 7.0.

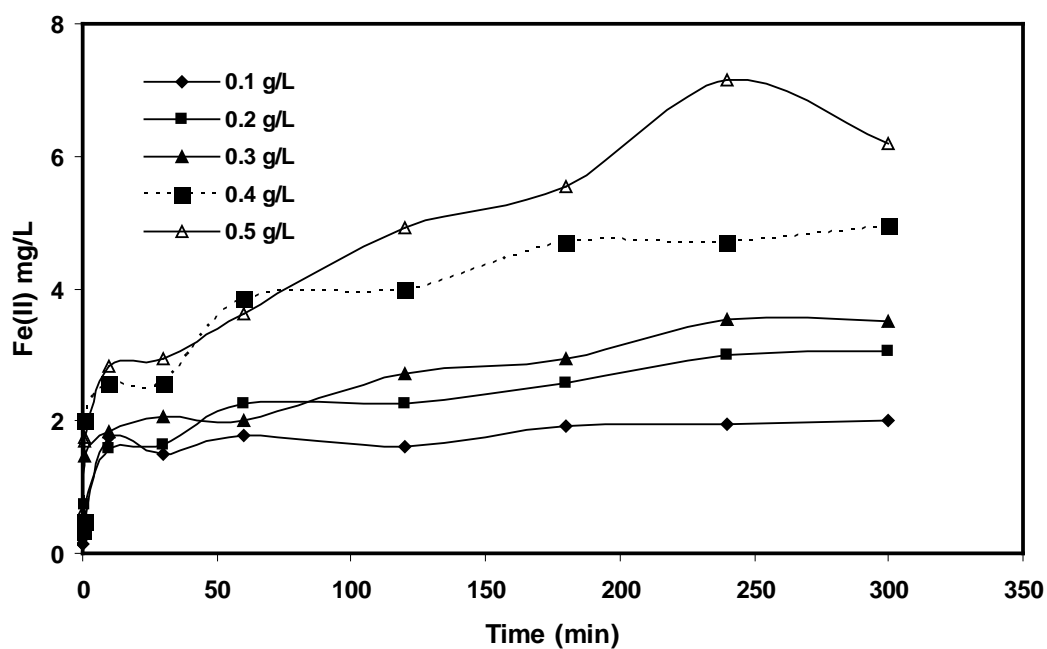

**Fig. 2.**  $\text{Fe}^{2+}$  concentration in the persulfate-ZVI system.  $[\text{Aniline}]_0 = 0.05 \text{ mM}$ ;  $[\text{PS}]_0 = 2.5 \text{ mM}$ ; Temp. =  $25^\circ\text{C}$ ;  $[\text{ZVI}] = 0.1\text{--}0.5 \text{ g L}^{-1}$ ; pH = 7.0.

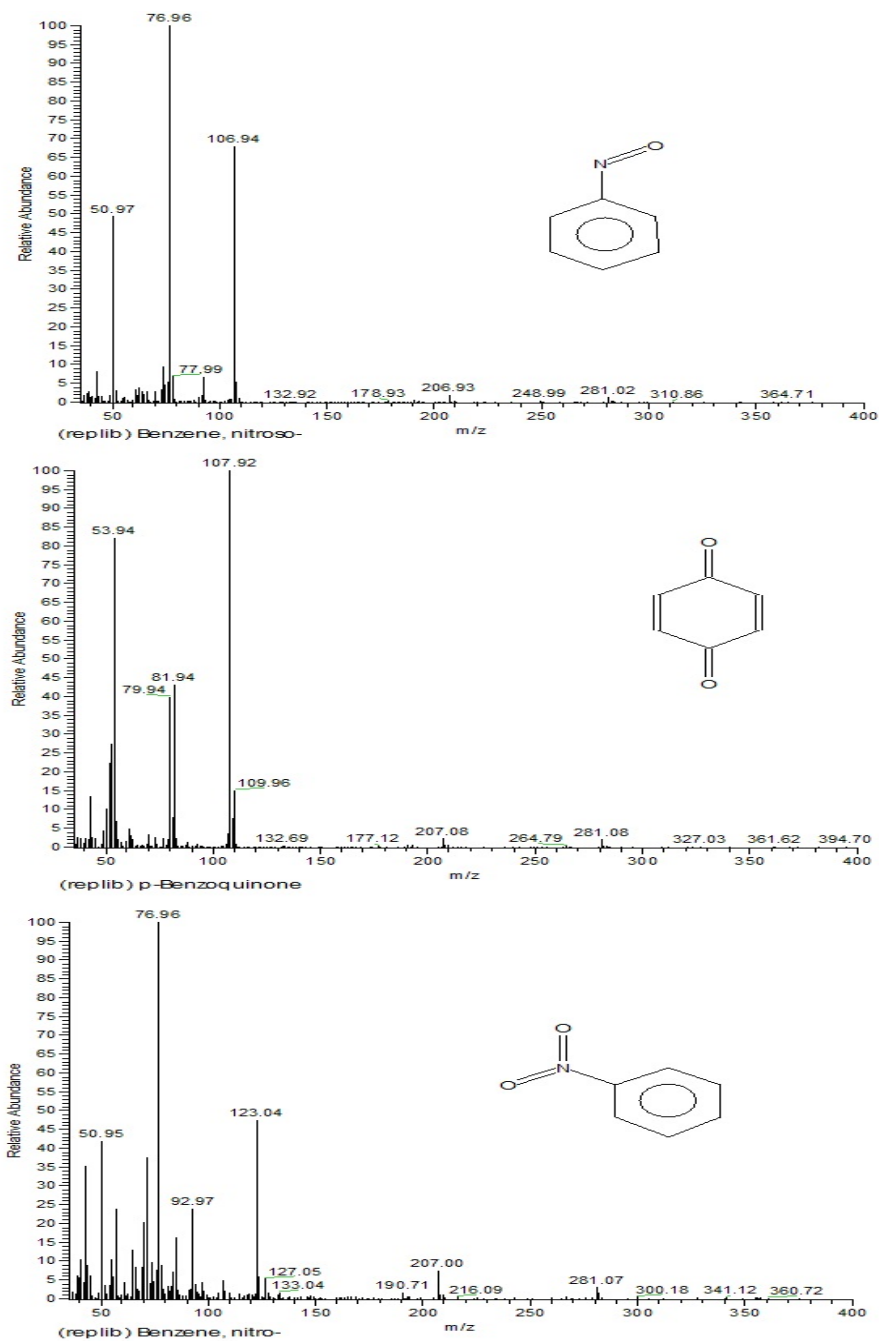

Fig.3 EI mass spectrum of main intermediates of aniline by persulfate-ZVI system with  
GC /MS
